# Supplementary material
Source: PubMed Central journal article supplement (PMC4684747)
Supplement: NIHMS727320-supplement-6.pdf [file NIHMS727320-supplement-6.pdf]

**Supplemental Table 1** Number of mice in each genotype and gender studied over 3 to 21 months for HCC development.

| MALE    |       | Timepoints |     |     |      |      |      |      |
|---------|-------|------------|-----|-----|------|------|------|------|
|         |       | 3mo        | 6mo | 9mo | 12mo | 15mo | 18mo | 21mo |
| WT      | Total | 31         | 28  | 25  | 28   | 24   | 15   | 31   |
| ATX     | Total | 22         | 27  | 14  | 20   | 13   | 18   | 31   |
| IRS     | Total | 24         | 24  | 21  | 21   | 18   | 13   | 27   |
| ATX/IRS | Total | 19         | 12  | 6   | 24   | 20   | 22   | 9    |

| FEMALE  |       | Timepoints |     |     |      |      |      |      |
|---------|-------|------------|-----|-----|------|------|------|------|
|         |       | 3mo        | 6mo | 9mo | 12mo | 15mo | 18mo | 21mo |
| WT      | Total | 43         | 41  | 32  | 28   | 23   | 29   | 36   |
| ATX     | Total | 33         | 32  | 19  | 20   | 15   | 21   | 34   |
| IRS     | Total | 21         | 27  | 25  | 23   | 19   | 22   | 20   |
| ATX/IRS | Total | 12         | 10  | 11  | 12   | 16   | 18   | 22   |
